# Supplementary material
Source: publisher figshare collection journal article supplement (https://future-science-group.figshare.com/ndownloader/files/33851498)
Supplement: Supplementary file 1 [file 33851498]

Supplementary Material 4. Forecasted demand level for products over 20 years. Dotted lines refer to the scenario with fast-track designations, solid lines refer to the scenario without fast-track designations.
